# Supplementary material for: Overexpression of Homer1a in the basal and lateral amygdala impairs fear conditioning and induces an autism-like social impairment
Source: Mol Autism. 2016 Feb 29;7:16. doi: 10.1186/s13229-016-0077-9 (PMC4770673; doi:10.1186/s13229-016-0077-9)
Supplement: Additional file 1: — Table comparing parametric and non-parametric statistical outcome for selected behavioral experiments. For behavioral experiments with sample sizes of n < 10 per group, statistical analyses were performed using both parametric and non-parametric statistical analysis to eliminate chances of normality assumption violation. (XLSX 15 kb) [file 13229_2016_77_MOESM1_ESM.xlsx]

## Sheet: Sheet1
Figure 4(A-C) : Open field with AAV-GFP and AAV-Homer1a Virus
Group	# of animals	Experiment		Parametric				Non-Parametric
AAV-GFP	7	Center time		Student's t-test				Man-Whitney U-test
AAV-Homer1a	6			t(11) = 0.04,p = 0.96				p = 0.66
		Center Entries		t(11) = 0.09, p = 0.92				p = 0.66
								p = 0.99
		Mean Distance		t(11) = 0.11,p = 0.91
Figure 4D&E : Social interaction with AAV-GFP and AAV-Homer1a Virus
Group	# of animals	Experiment		Parametric				Non-Parametric
AAV-GFP	8	Social time		Student's t-test				Man-Whitney U-test
AAV-Homer1a	9			t(15) = 1.78, p = 0.04				p = 0.02
		Mean Distance		t(15) = 1.12, p = 0.28				p = 0.12
Figure 5A &B: Fear conditioning with AAV-GFP and AAV-Homer1a Virus
Group	# of animals	Experiment		Parametric				Non-Parametric
AAV-GFP	6	STM		One way ANOVA with repeated measure				Friedman test (repeated measure)					Man-Whitney U-test (between group)
AAV-Homer1a	6			F(1,10) = 5.41, p = 0.04				χ2 = 5.391 , p = 0.07					p = 0.04
		LTM		F(1,10) = 6.85, p = 0.02				χ2 = 5.789 , p = 0.671					p = 0.03
Figure 6E: Fear conditioning with H1aV-(W24A) and H1aV Virus
Group	# of animals	Experiment		Parametric					Non-Parametric
H1aV-(W24A)	7	LTM		One way ANOVA with repeated measure				Friedman test (repeated measure)					Man-Whitney U-test (between group)
H1aV	9			F(1,14) = 5.97, p = 0.02				χ2 = 1.238 , p = 0.53					p = 0.03
Figure 6C&D : Social interaction with H1aV-(W24A) and H1aV Virus
Group	# of animals	Experiment		Parametric					Non-Parametric
H1aV-(W24A)	7			Student's t-test					Man-Whitney U-test
H1aV	8	Social time		t(13) = 2.23, p = 0.04					p = 0.04
		Mean Distance		t(13) = 0.49, p = 0.62					p = 0.12
